# Supplementary material
Source: HighWire-hosted journal article supplement (https://jcs.biologists.org/content/suppl/2009/12/12/123.1.84)

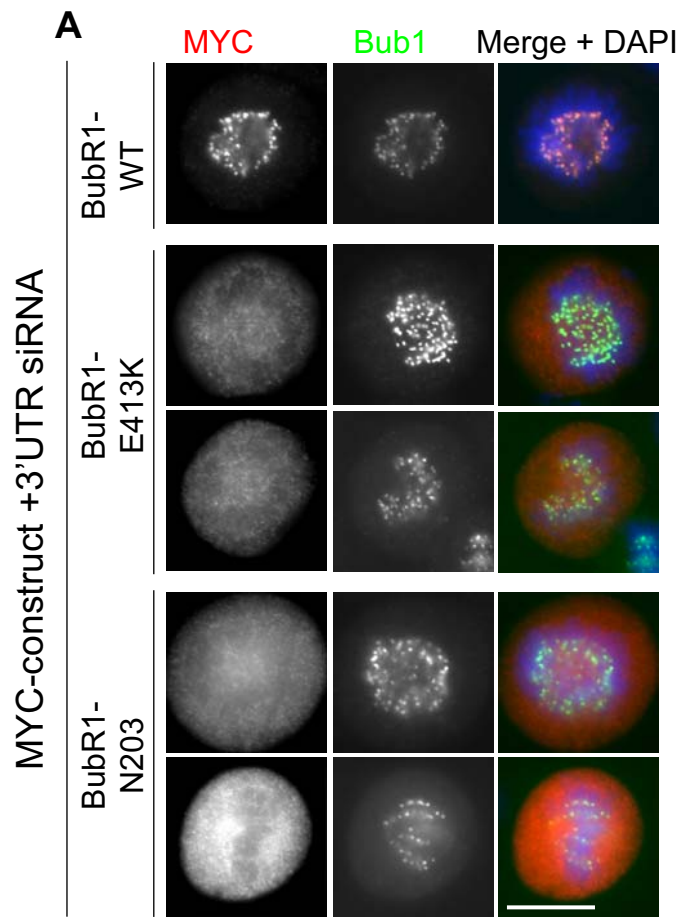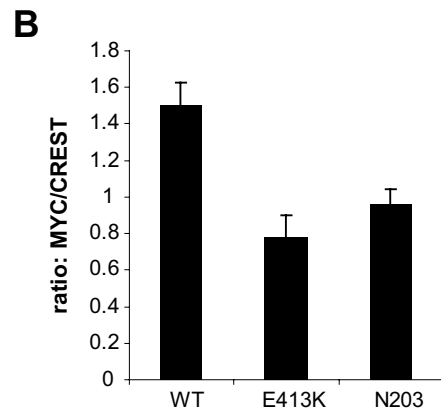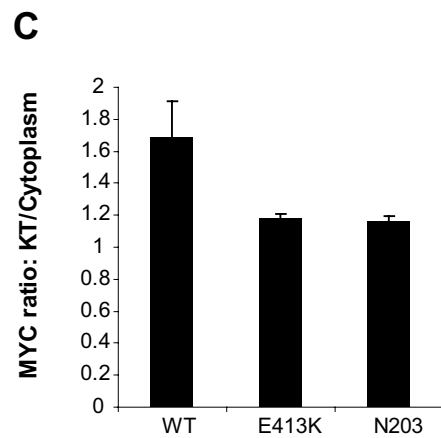

Supplement: 056507-FigS7.pdf [file 056507-FigS7.pdf]
